# Supplementary material for: Extensive clinical experience: a simple guide to basal insulin adjustments for long-distance travel
Source: PubMed Central journal article supplement (PMC7962589; doi:10.1186/2251-6581-12-59), 2013-12-20
Supplement: 40200_2013_190_MOESM1_ESM.pdf [file 40200_2013_190_MOESM1_ESM.pdf]

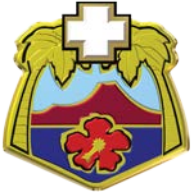

# WESTWARD travel Basal Insulin Adjustment

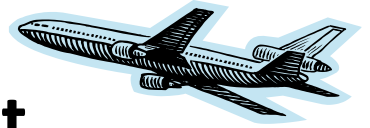

## STEP 1

### Departure Info

City: \_\_\_\_\_

Time Zone: \_\_\_\_\_

Date / Time: \_\_\_\_\_

### Arrival Info

City: \_\_\_\_\_

Time Zone: \_\_\_\_\_

Date / Time: \_\_\_\_\_

## STEP 2

### DAY BEFORE TRAVEL (date \_\_\_\_\_)

- Be sure to pack adequate supplies in your CARRY-ON bag -

**Last dose of basal insulin: \_\_\_ units @ \_\_\_ am/pm**

## STEP 3

### DURING TRAVEL

- Start travel with your watch set to your Departure Time Zone -
- Take your bolus insulin as needed for meals -
- Check your blood sugar frequently and watch for hypoglycemia! -

**At \_\_\_ am/pm DEPARTURE TIME ZONE  
take ½ of your “usual” basal insulin dose = \_\_\_ units**

- Then set your watch to \_\_\_ am/pm (*Arrival Time Zone*) -

**At \_\_\_ am/pm ARRIVAL TIME ZONE  
take ½ of your “usual” basal insulin dose = \_\_\_ units**

*(This may be while still traveling or after arrival depending on the time)*

## STEP 4

### AFTER ARRIVING (date \_\_\_\_\_)

- Resume normal basal insulin dosing in the Arrival Time Zone -

**Next dose of basal insulin: \_\_\_ units @ \_\_\_ am/pm**

Free for non-commercial use, from Tripler Army Medical Center, Honolulu, HI, USA  
Intended for use under supervision of a licensed diabetes care provider

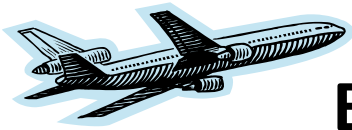

# EASTWARD travel Basal Insulin Adjustment

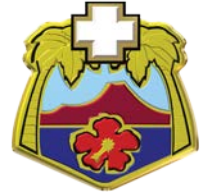

## STEP 1

### Departure Info

### Arrival Info

City: \_\_\_\_\_  
Time Zone: \_\_\_\_\_  
Date / Time: \_\_\_\_\_

City: \_\_\_\_\_  
Time Zone: \_\_\_\_\_  
Date / Time: \_\_\_\_\_

Number of time zones crossed: \_\_\_\_\_  
Travel time: \_\_\_\_\_ hrs

## STEP 2

### DAY BEFORE TRAVEL (date \_\_\_\_\_)

- Be sure to pack adequate supplies in your CARRY-ON bag -

**Last dose of basal insulin: \_\_\_\_\_ units @ \_\_\_\_\_ am/pm**

## STEP 3

### DURING TRAVEL

- Start travel with your watch set to your Departure Time Zone -
- Take your bolus insulin as needed for meals -
- Check your blood sugar frequently and watch for hypoglycemia! -

$$\text{Travel Dose} = \left( \frac{\text{Normal Basal Dose}}{\text{Basal Dose}} \right) \times \left( 0.9 - \frac{\# \text{ of time zones crossed}}{\text{hrs between basal insulin doses}} \right)$$

$$\boxed{\text{_____ units}} = \left( \text{_____} \right) \times \left( 0.9 - \text{_____} \right)$$

**Give travel dose @ \_\_\_\_\_ am/pm DEPARTURE TIME ZONE**

- Then set your watch to \_\_\_\_\_ am/pm (*Arrival Time Zone*) -

## STEP 4

### AFTER ARRIVING (date \_\_\_\_\_)

- Resume normal basal insulin dosing in the Arrival Time Zone -  
(*This may be while still traveling or after*)

**Next dose of basal insulin: \_\_\_\_\_ units @ \_\_\_\_\_ am/pm**

Free for non-commercial use, from Tripler Army Medical Center, Honolulu, HI, USA  
Intended for use under supervision of a licensed diabetes care provider
